# Supplementary material for: Pharmacogenetic variants of infliximab response in young patients with inflammatory bowel disease
Source: PubMed Central journal article supplement — Clin Transl Sci. 2021 Jun 19;14(6):2184–92. doi: 10.1111/cts.13075 (PMC8604212; doi:10.1111/cts.13075), 2021-06-19
Supplement: CTS-14-2184-s001.pdf [file CTS-14-2184-s001.pdf]

**Table S1.** *FCGR3A* genotypes and clinical response.

|                                             | <i>FCGR3A</i><br>GENOTYPES | OR   | CI         | p-value |
|---------------------------------------------|----------------------------|------|------------|---------|
| <b>Response at the<br/>end of induction</b> | Het (FV)                   | 6.76 | 1.89-24.19 | 0.003   |
|                                             | Var (VV)                   | 5.43 | 1.22-24.07 | 0.026   |
| <b>Response at 22<br/>weeks</b>             | Het (FV)                   | 8.89 | 2.52-31.41 | 0.001   |
|                                             | Var (VV)                   | 4.39 | 1.05-18.35 | 0.042   |
| <b>Response at 52<br/>weeks</b>             | Het (FV)                   | 6.58 | 1.91-23.17 | 0.003   |
|                                             | Var (VV)                   | 2.25 | 0.61-10.11 | 0.198   |

Het: heterozygous variant, Var: homozygous variant, OR: odds ratio, CI: confidence interval.
