# Supplementary material for: Pharmacogenetic variants of infliximab response in young patients with inflammatory bowel disease
Source: PubMed Central journal article supplement — Clin Transl Sci. 2021 Jun 19;14(6):2184–92. doi: 10.1111/cts.13075 (PMC8604212; doi:10.1111/cts.13075), 2021-06-19
Supplement: CTS-14-2184-s002.pdf [file CTS-14-2184-s002.pdf]

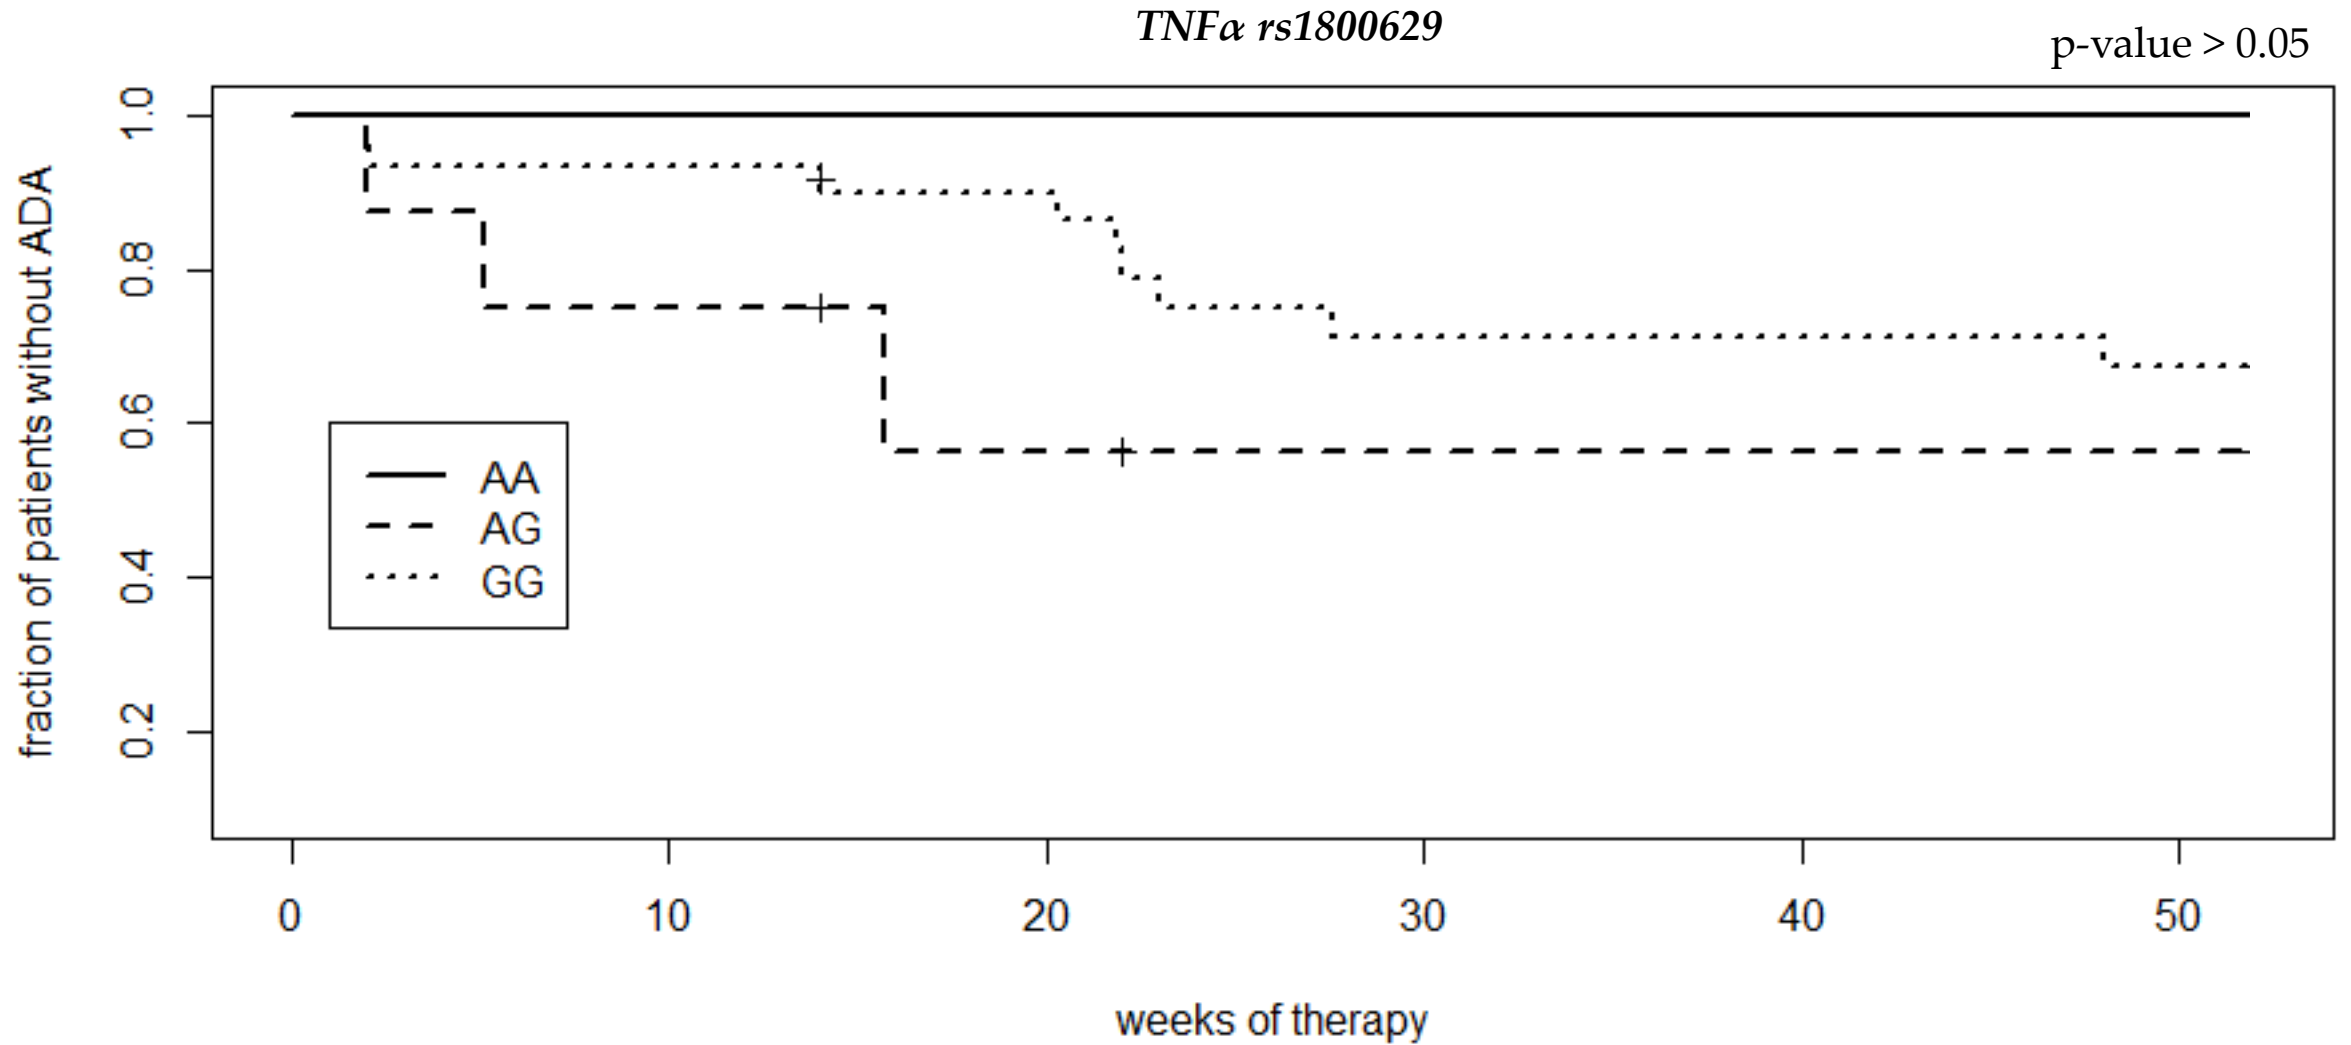

**Supplementary Figure S1.** Survival curves of infliximab anti-drug antibody (ADA) production according to *TNF $\alpha$  rs1800629* genotype from a Cox proportional hazard model. Dash indicates patients that have interrupted the follow up before weeks 52.
